# Supplementary material for: The roles of vision and antennal mechanoreception in hawkmoth flight control
Source: eLife journal article supplement (doi:10.7554/elife.37606), 2018-12-10
Supplement: supp [file elife-37606-supp-v1.zip]

Archive with 24 entries (24 files):
- elife_poa_e37606_Supplementary_File_13.docx
- elife_poa_e37606_Figure_3_figure_supplement_2.pdf
- elife_poa_e37606_Figure_1_figure_supplement_1.pdf
- elife_poa_e37606_Supplementary_File_11.docx
- elife_poa_e37606_Figure_2_figure_supplement_2.pdf
- elife_poa_e37606_Supplementary_File_9.docx
- elife_poa_e37606_Supplementary_File_1.docx
- elife_poa_e37606_Figure_2_figure_supplement_1.pdf
- elife_poa_e37606_Supplementary_File_5.docx
- elife_poa_e37606_Supplementary_File_12.docx
- elife_poa_e37606_Supplementary_File_8.docx
- elife_poa_e37606_Supplementary_File_6.docx
- elife_poa_e37606_Supplementary_File_4.docx
- elife_poa_e37606_Supplementary_File_3.docx
- elife_poa_e37606_Transparent_Reporting_File.docx
- elife_poa_e37606_Figure_2_source_data_1.zip
- elife_poa_e37606_Figure_3_figure_supplement_4.pdf
- elife_poa_e37606_Supplementary_File_7.docx
- elife_poa_e37606_Figure_3_source_data_2.zip
- elife_poa_e37606_Figure_3_source_data_1.zip
- elife_poa_e37606_Figure_3_figure_supplement_1.pdf
- elife_poa_e37606_Figure_3_figure_supplement_3.pdf
- elife_poa_e37606_Supplementary_File_2.docx
- elife_poa_e37606_Supplementary_File_10.docx
