# Supplementary material for: The roles of vision and antennal mechanoreception in hawkmoth flight control
Source: eLife journal article supplement (doi:10.7554/elife.37606), 2018-12-10
Supplement: supp [file elife-37606-supp-v1.zip › elife_poa_e37606_Supplementary_File_1.docx]

| **Conditions** | **Coefficient Estimate** | **t-value** | **p-value** |
| --- | --- | --- | --- |
| *flight* **ablate - control** | -1.27 | -1.53 | 0.126 |
| *tracking* **ablate - control** | -2.76 | -3.63 | <0.001 |
| *flight* **reatt - control** | -1.16 | -1.05 | 0.292 |
| *tracking* **reatt - control** | -0.83 | -0.88 | 0.380 |
| *flight* **dim - bright** | -1.01 | -1.93 | 0.054 |
| *tracking* **dim** **- bright** | -1.13 | -2.33 | 0.020 |
