# Supplementary material for: The roles of vision and antennal mechanoreception in hawkmoth flight control
Source: eLife journal article supplement (doi:10.7554/elife.37606), 2018-12-10
Supplement: supp [file elife-37606-supp-v1.zip › elife_poa_e37606_Supplementary_File_2.docx]

| **Treatment** | **Estimate** | **t-value** | **DF** | **p-value** |
| --- | --- | --- | --- | --- |
| **control** - **ablate** | -0.664 | -10.92 | 385 | <0.001 |
| **control** - **reatt** | -0.002 | -0.04 | 385 | 0.97 |
| **ablate** - **reatt** | 0.662 | 10.88 | 385 | <0.001 |
