# Supplementary material for: The roles of vision and antennal mechanoreception in hawkmoth flight control
Source: eLife journal article supplement (doi:10.7554/elife.37606), 2018-12-10
Supplement: supp [file elife-37606-supp-v1.zip › elife_poa_e37606_Supplementary_File_4.docx]

| **Treatment** | **Estimate** | **t-value** | **DF** | **p-value** |
| --- | --- | --- | --- | --- |
| **control** - **ablate** | -0.742 | -11.63 | 385 | <0.001 |
| **control** - **reatt** | -0.257 | -4.03 | 385 | 0.0001 |
| **ablate** - **reatt** | 0.485 | 7.60 | 385 | <0.001 |
