# Supplementary material for: The roles of vision and antennal mechanoreception in hawkmoth flight control
Source: eLife journal article supplement (doi:10.7554/elife.37606), 2018-12-10
Supplement: supp [file elife-37606-supp-v1.zip › elife_poa_e37606_Supplementary_File_13.docx]

| **Treatment** | **Χ2** | **p-value** |
| --- | --- | --- |
| **overall** | 4.33 | 0.115 |
| **control** - **ablate** |  | 0.832 |
| **control** - **reatt** |  | 0.319 |
| **ablate** - **reatt** |  | 0.107 |
