# Supplementary figures and images for: The roles of vision and antennal mechanoreception in hawkmoth flight control
Source: eLife journal article supplement (doi:10.7554/elife.37606), 2018-12-10

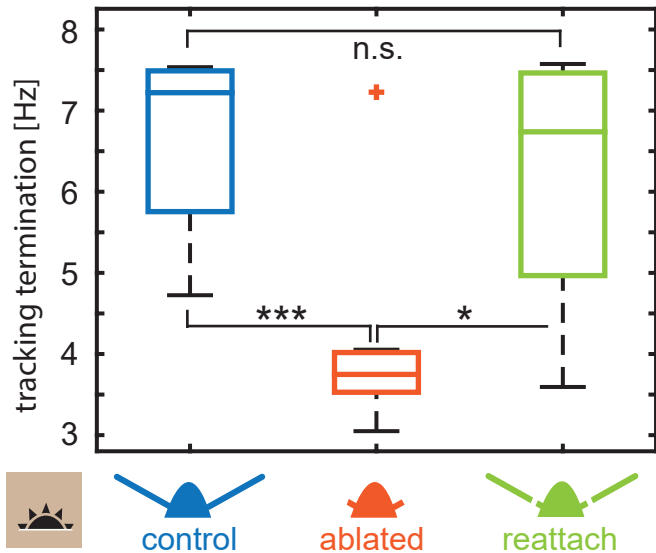

Supplement: supp [file elife-37606-supp-v1.zip › elife_poa_e37606_Figure_3_figure_supplement_2.pdf]

**control**

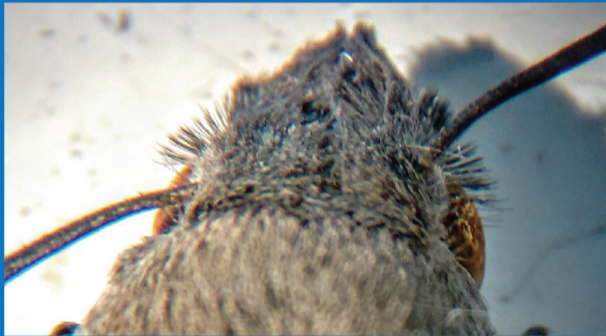

**ablated**

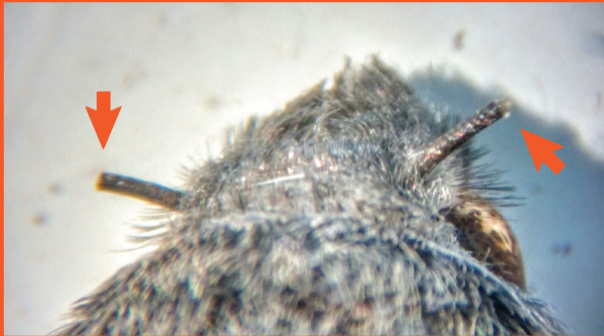

**reattach**

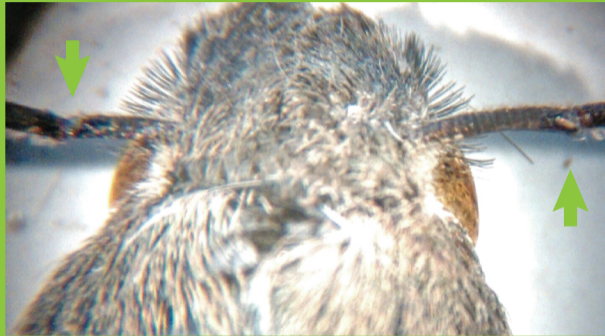

Supplement: supp [file elife-37606-supp-v1.zip › elife_poa_e37606_Figure_1_figure_supplement_1.pdf]

**A**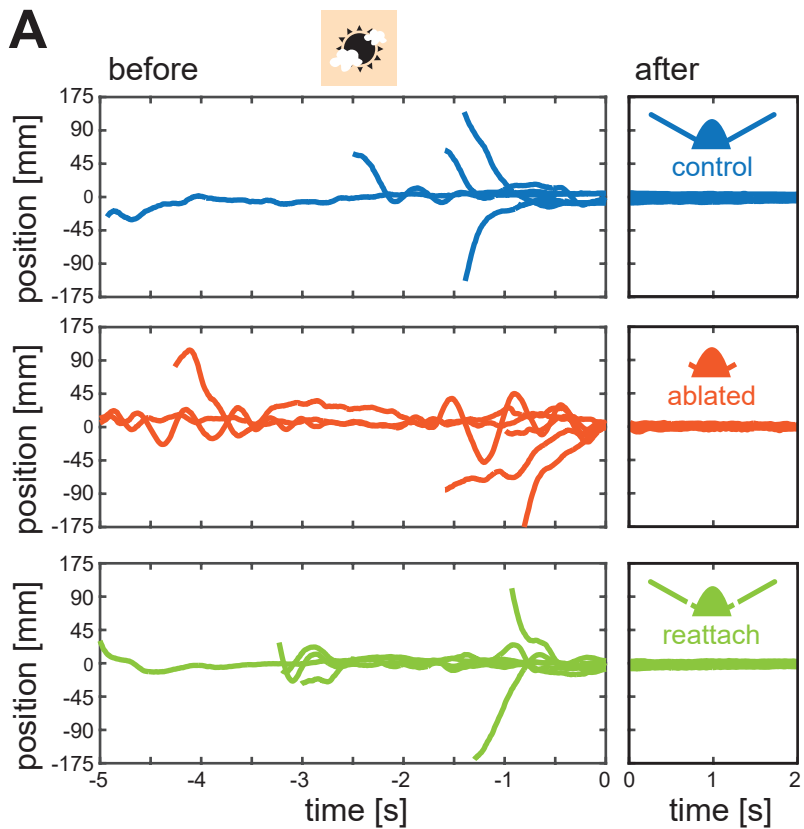**B**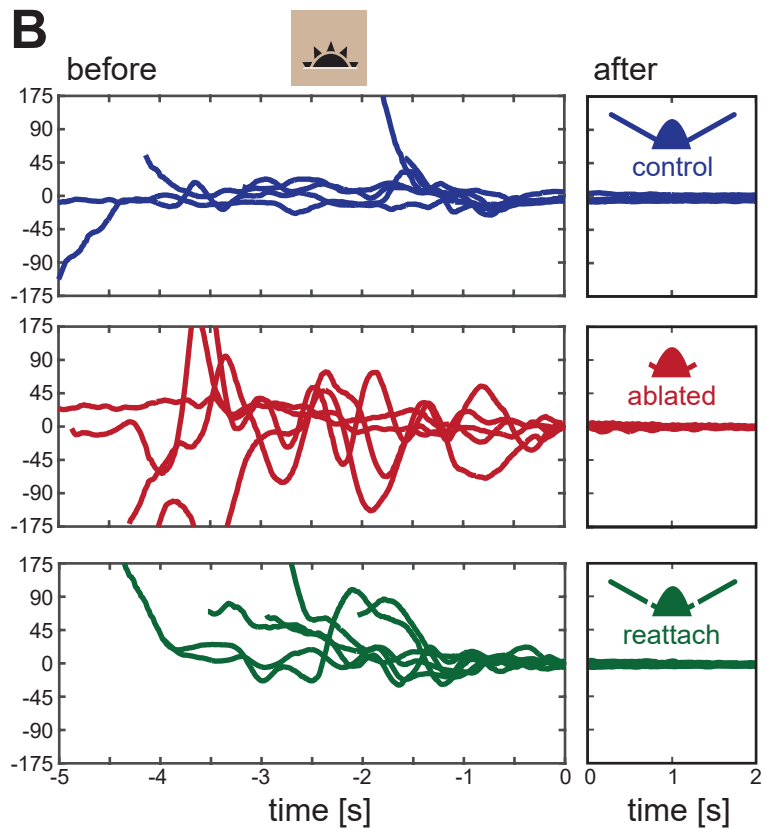

Supplement: supp [file elife-37606-supp-v1.zip › elife_poa_e37606_Figure_2_figure_supplement_1.pdf]

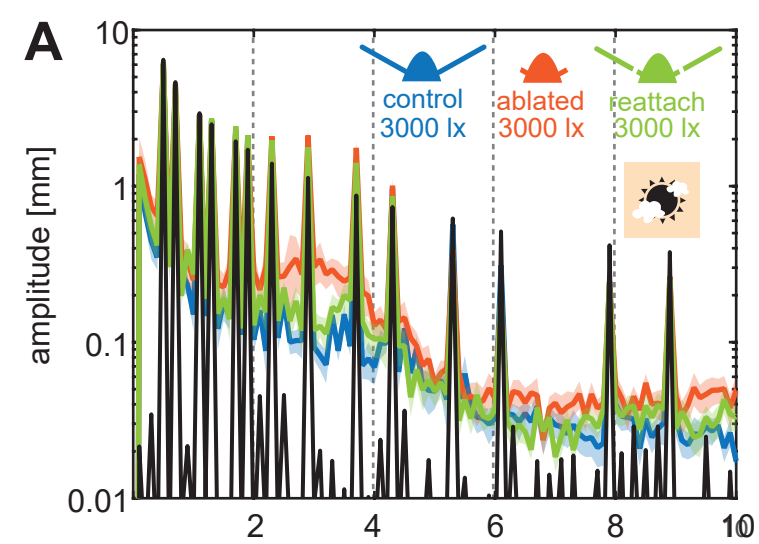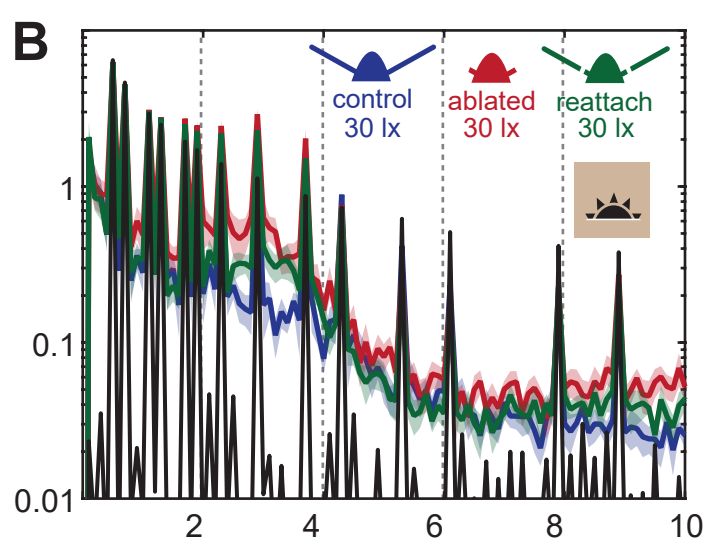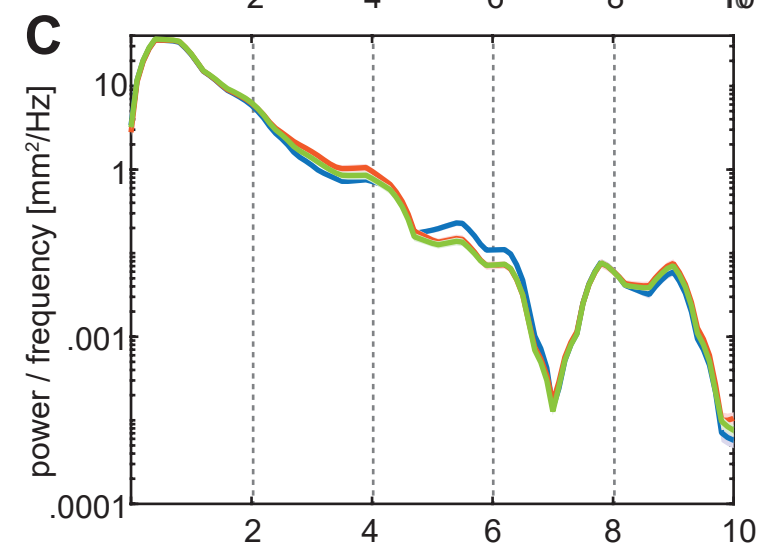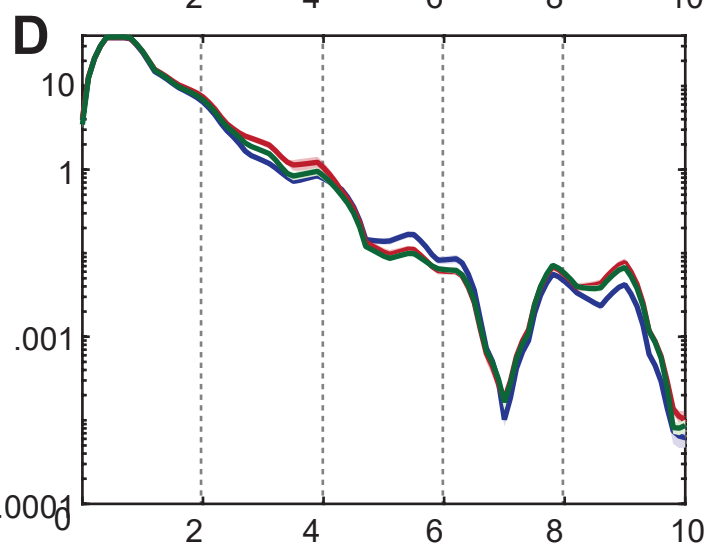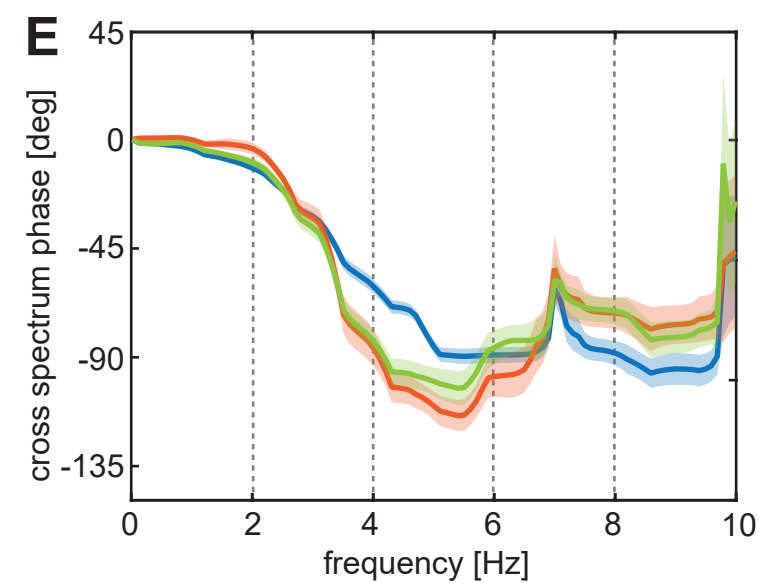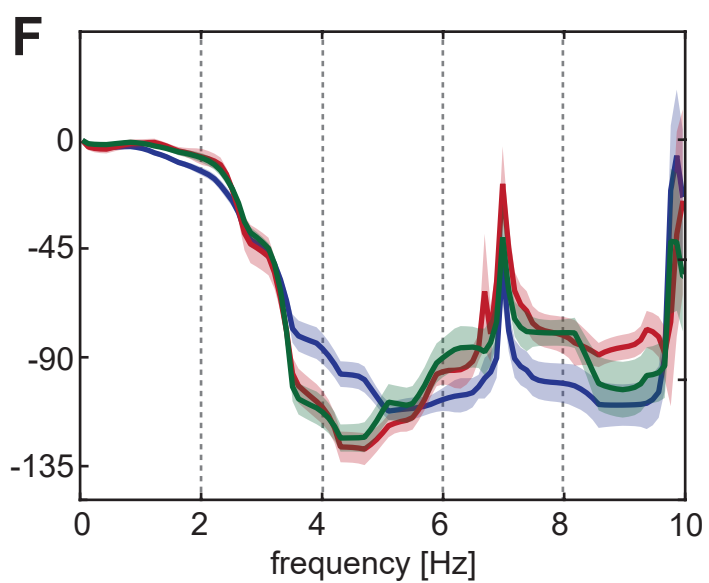

Supplement: supp [file elife-37606-supp-v1.zip › elife_poa_e37606_Figure_3_figure_supplement_4.pdf]

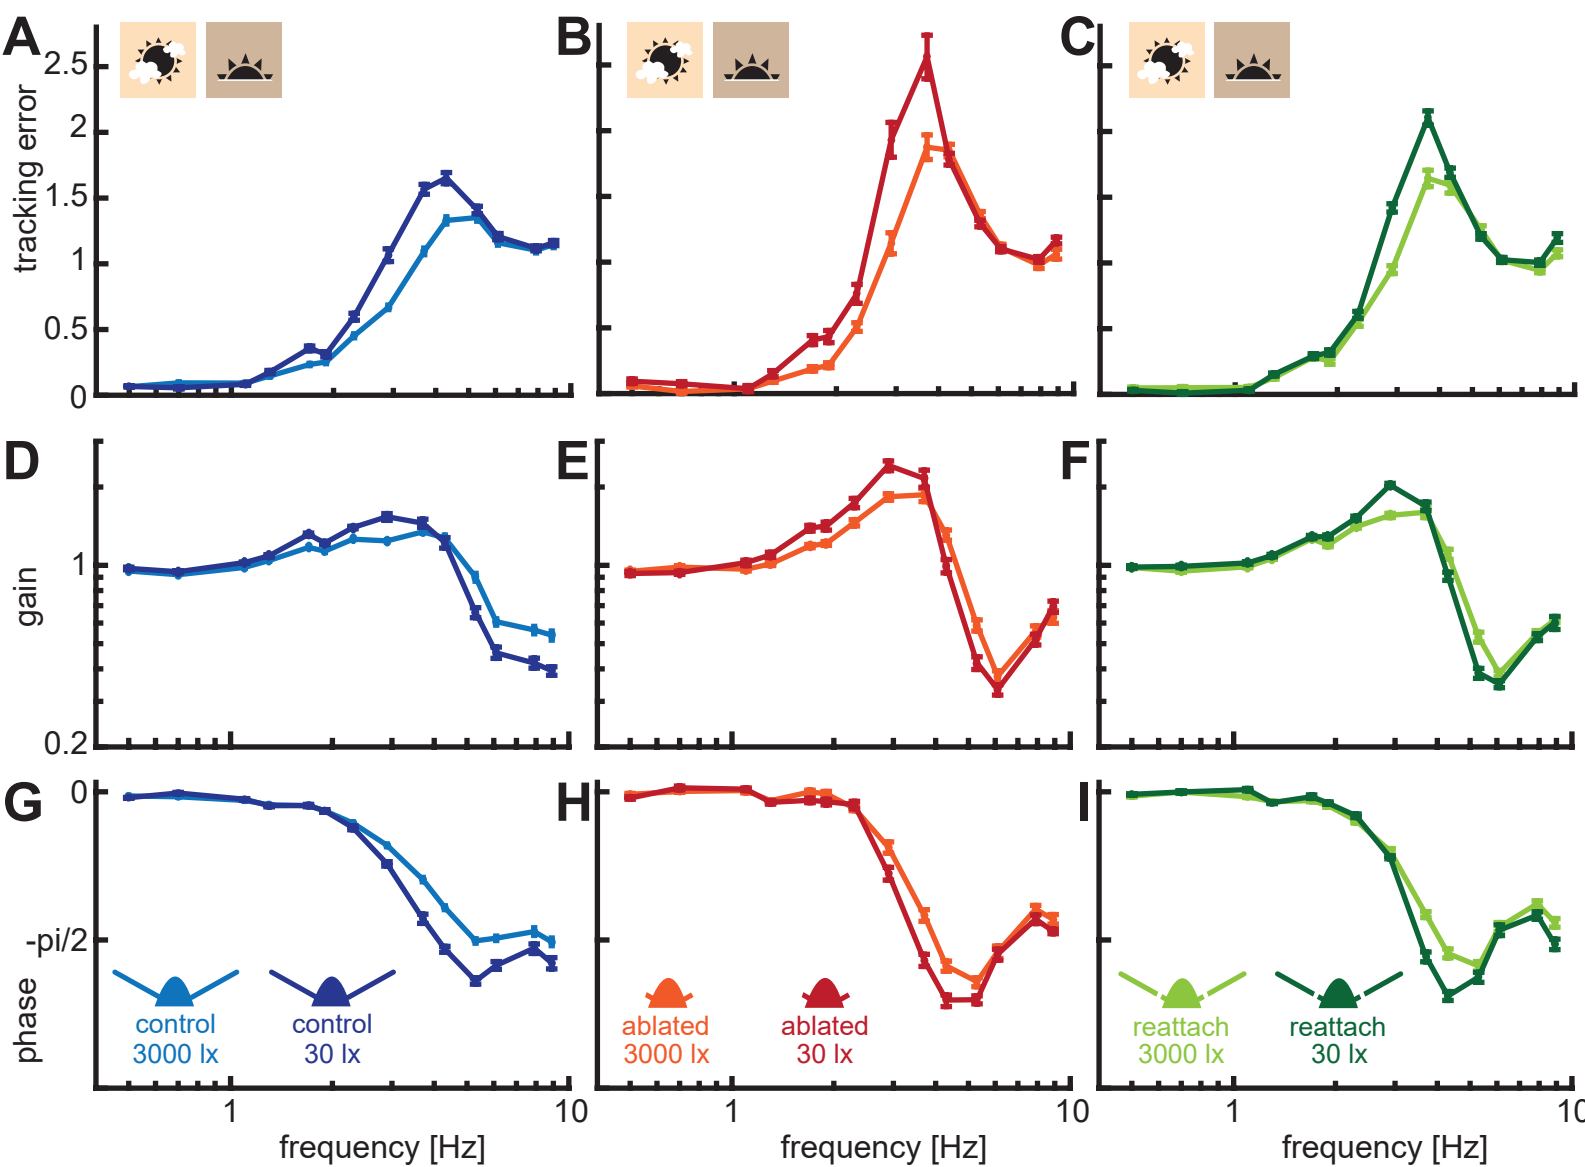

Supplement: supp [file elife-37606-supp-v1.zip › elife_poa_e37606_Figure_3_figure_supplement_1.pdf]

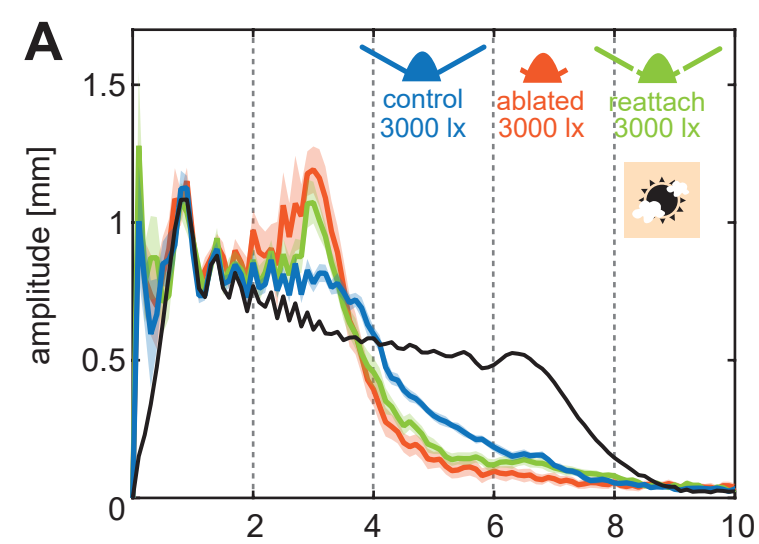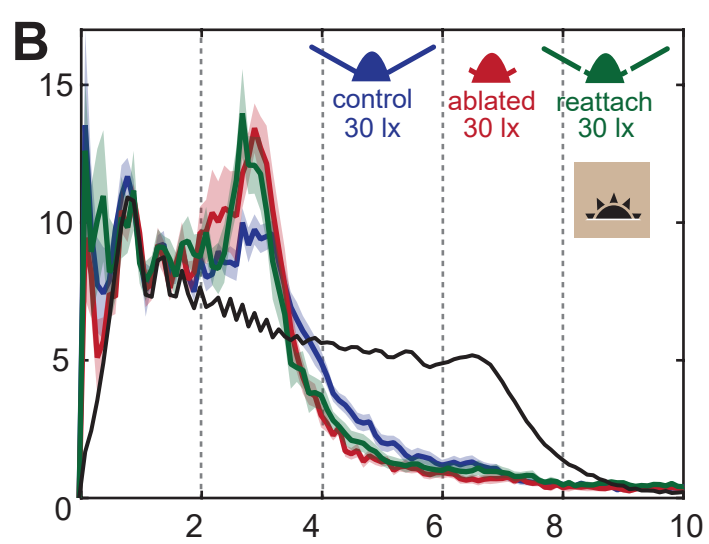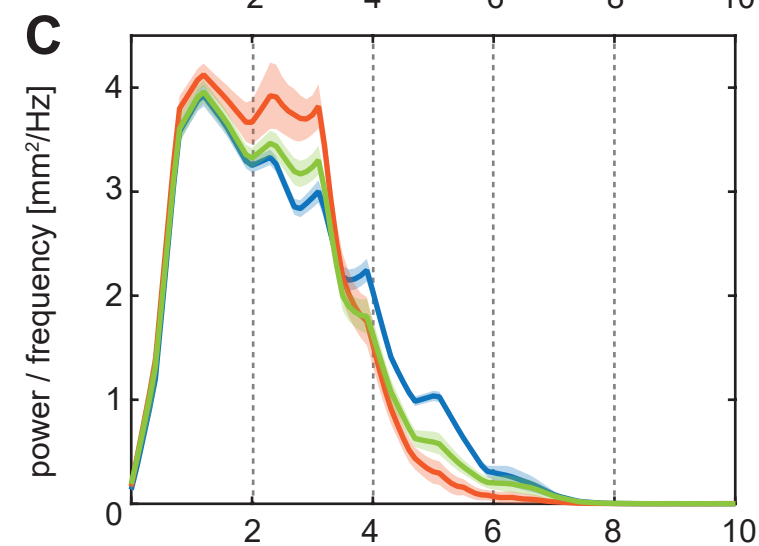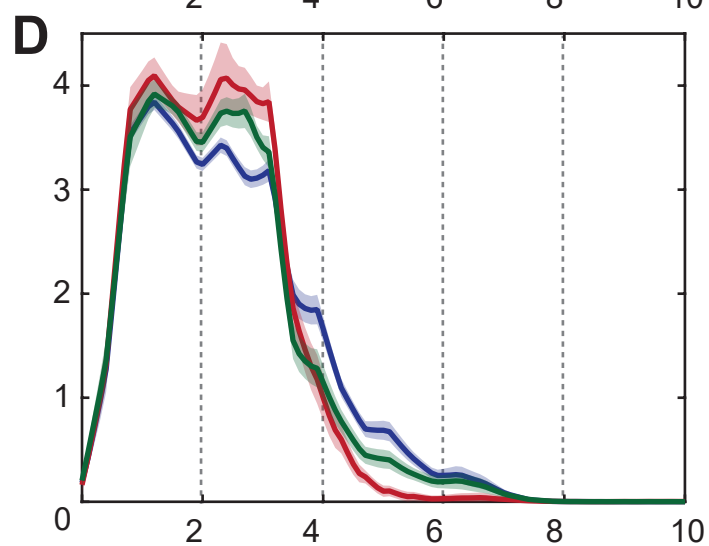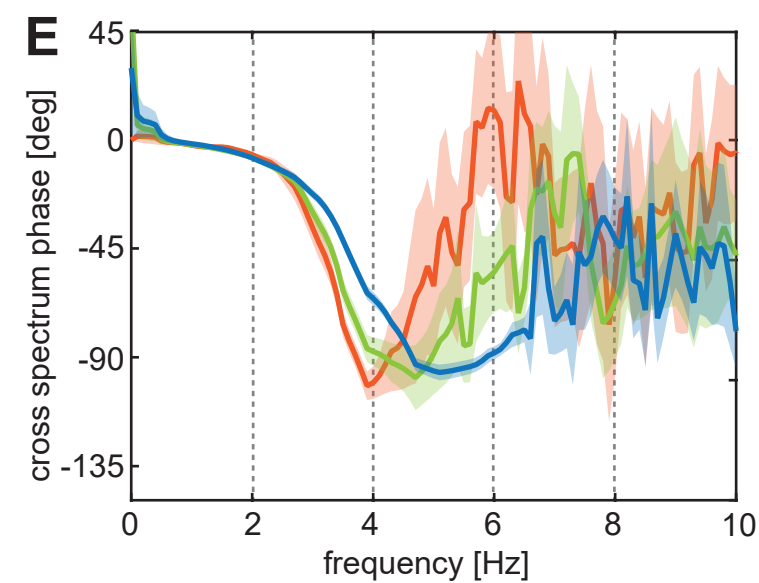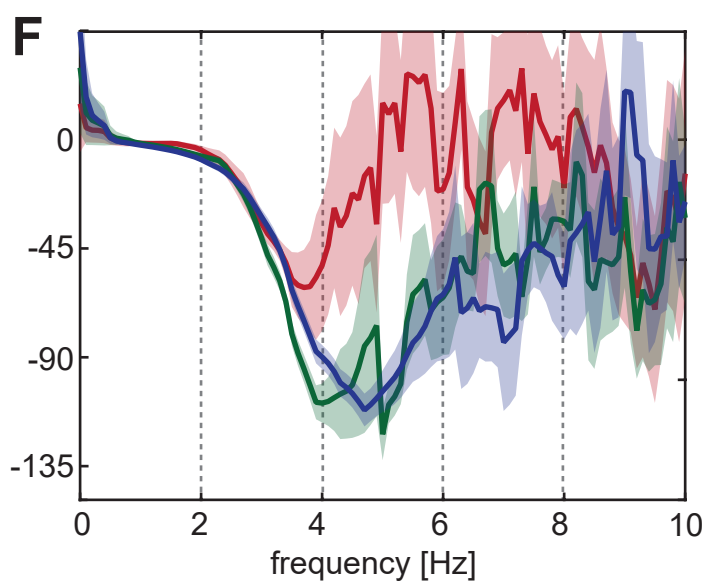

Supplement: supp [file elife-37606-supp-v1.zip › elife_poa_e37606_Figure_3_figure_supplement_3.pdf]
